# Supplementary material for: Probiotics and gastrointestinal disease: successes, problems and future prospects
Source: Springer Nature journal article supplement (doi:10.1186/1757-4749-1-19), 2009-11-23
Supplement: 13099_2009_19_MOESM1_ESM.pdf [file 13099_2009_19_MOESM1_ESM.pdf]

**A****Delivery**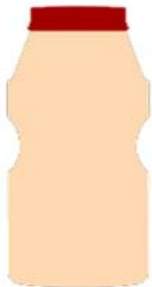

Improved tolerance to stress encountered during preparation and storage of the delivery matrix

**B*****in vivo* Survival**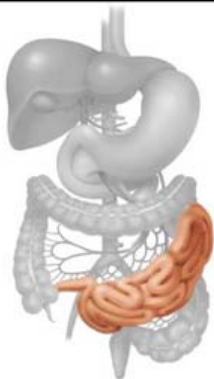

Improved intestinal colonization and persistence

**C****Clinical Efficacy**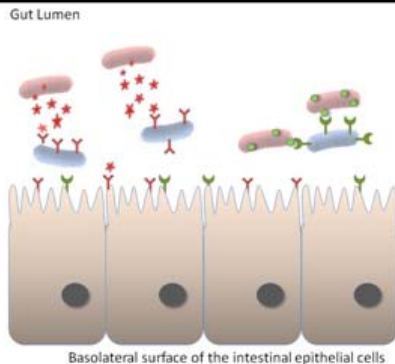

Improved prophylactic/therapeutic efficacy using strains tailored to target specific pathogens and/or toxins
