# Supplementary material for: Probiotics and gastrointestinal disease: successes, problems and future prospects
Source: Springer Nature journal article supplement (doi:10.1186/1757-4749-1-19), 2009-11-23
Supplement: 13099_2009_19_MOESM2_ESM.pdf [file 13099_2009_19_MOESM2_ESM.pdf]

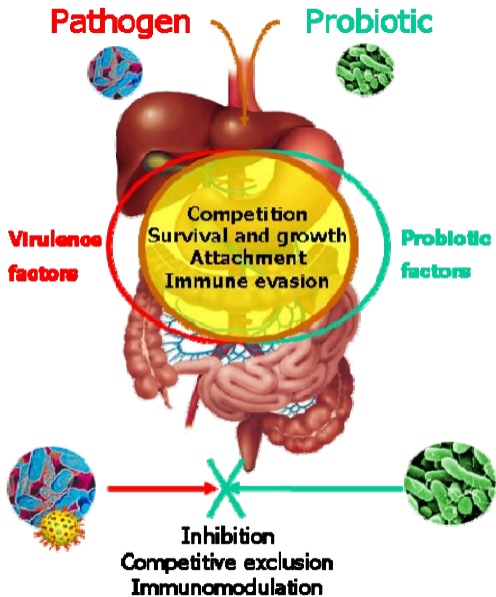

Challenges:

Survive gastric juice

Survive bile

Compete with flora

Attachment/**invasion**

Interact with immune system

Impact health (-/+)
