# Supplementary figures and images for: Probiotics and gastrointestinal disease: successes, problems and future prospects
Source: Springer Nature journal article supplement (doi:10.1186/1757-4749-1-19), 2009-11-23

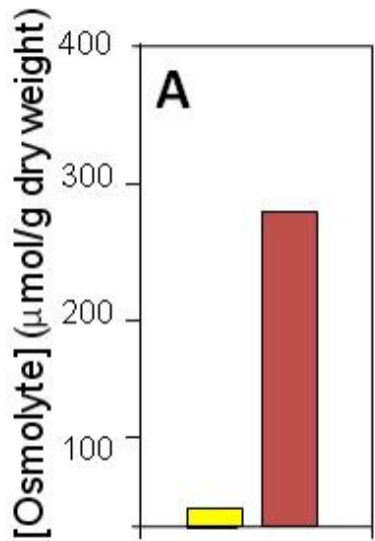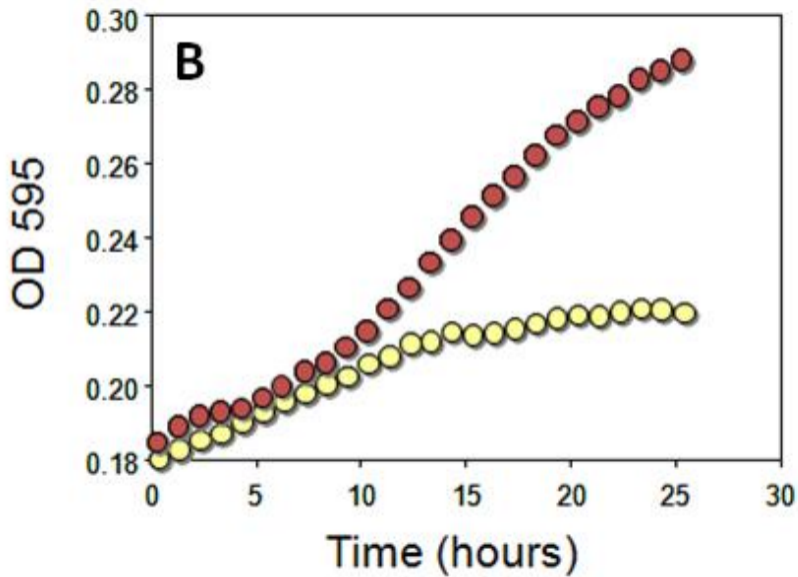

Supplement: 13099_2009_19_MOESM3_ESM.pdf [file 13099_2009_19_MOESM3_ESM.pdf]

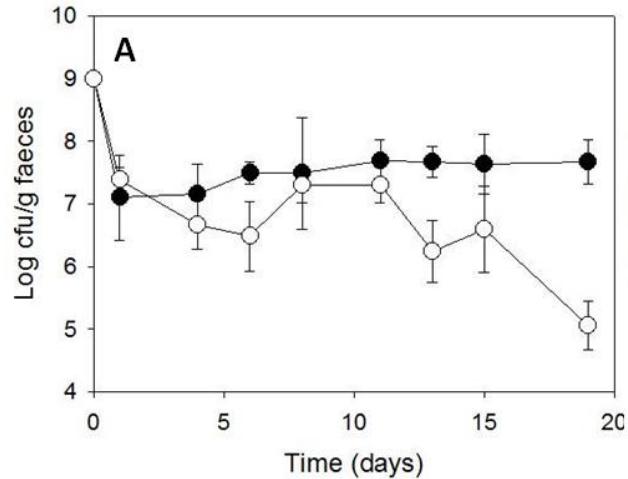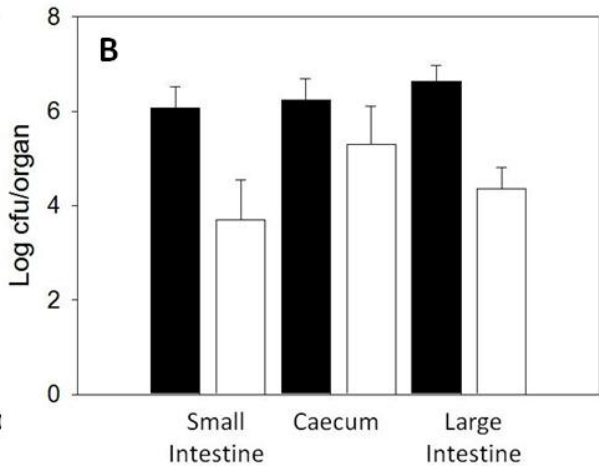

Supplement: 13099_2009_19_MOESM4_ESM.pdf [file 13099_2009_19_MOESM4_ESM.pdf]
